# Supplementary material for: In Depth Characterization of Repetitive DNA in 23 Plant Genomes Reveals Sources of Genome Size Variation in the Legume Tribe Fabeae
Source: PubMed Central journal article supplement (PMC4659654; doi:10.1371/journal.pone.0143424), 2015-11-25
Supplement: pone.0143424.s001.pdf [file pone.0143424.s001.pdf]

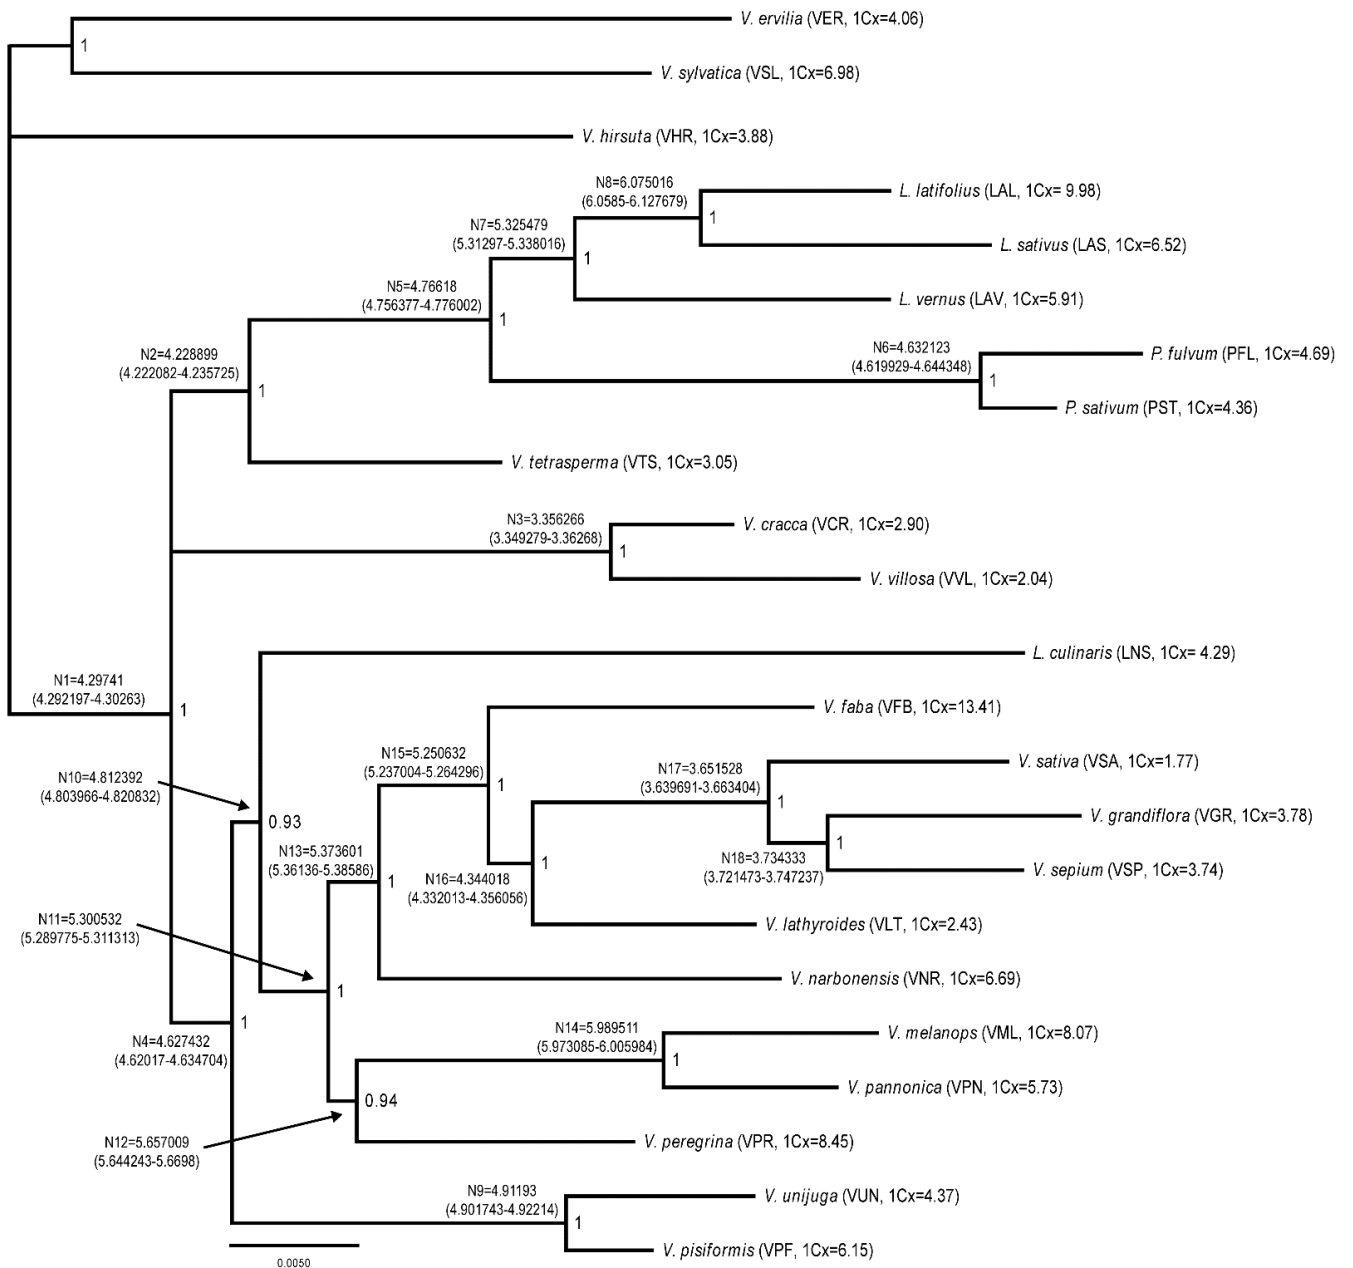

N=MRCA-1Cx (pg)  
(95% Confidence Interval)

**Supplementary Fig. S1** - Fifty percent majority-rule consensus tree from Bayesian inference (ITS, trnS-C, matK) showing the phylogenetic relationships of the 23 investigated *Fabae* species. Posterior probabilities are indicated for each node. The ancestral genome sizes reconstructed (1Cx-values [pg]) for the most recent common ancestor (MRCA) of each clade are depicted together with the 95% confidence interval in brackets.
