# Supplementary material for: In Depth Characterization of Repetitive DNA in 23 Plant Genomes Reveals Sources of Genome Size Variation in the Legume Tribe Fabeae
Source: PubMed Central journal article supplement (PMC4659654; doi:10.1371/journal.pone.0143424), 2015-11-25
Supplement: pone.0143424.s003.pdf [file pone.0143424.s003.pdf]

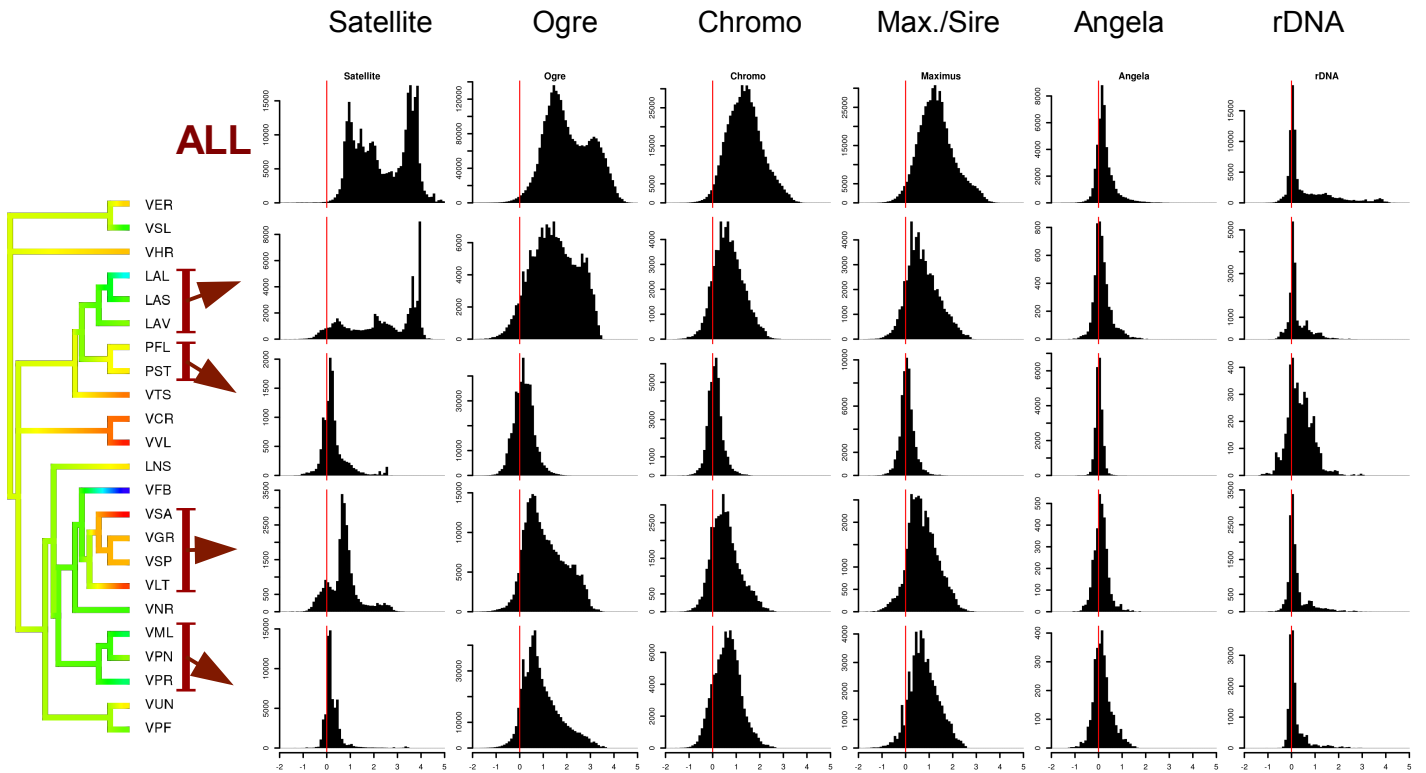

**Supplementary Fig. S3. Sequence conservation of repeats within groups of closely related species.** The Hs/Ho ratios were calculated either for all *Fabeae* (ALL), or only for groups of two to four species as marked by the brown dimension bars on the phylogenetic tree. For explanation of the histograms see Fig. 4.
