# Supplementary material for: In Depth Characterization of Repetitive DNA in 23 Plant Genomes Reveals Sources of Genome Size Variation in the Legume Tribe Fabeae
Source: PubMed Central journal article supplement (PMC4659654; doi:10.1371/journal.pone.0143424), 2015-11-25
Supplement: pone.0143424.s005.pdf [file pone.0143424.s005.pdf]

**Supplementary Table S1. Genome size estimations of *Fabeae* species**

| Species                                                  | Code | Accession             |         | Chrom.<br>number<br>[2n] | Genome size |       |      |             |              |
|----------------------------------------------------------|------|-----------------------|---------|--------------------------|-------------|-------|------|-------------|--------------|
|                                                          |      | source                | code    |                          | 2n          | SD    | std. | 1C<br>[Gbp] | 1Cx<br>[Gbp] |
| <b><i>Vicia</i></b>                                      |      |                       |         |                          |             |       |      |             |              |
| <i>V. sativa</i> 'Ebena'                                 | VSA  | commercial            |         | 12                       | 3.627       | 0.025 | ZM   | 1.77        | 1.77         |
| <i>V. villosa</i>                                        | VVL  | IPK                   | VIC876  | 14                       | 4.164       | 0.056 | GM   | 2.04        | 2.04         |
| <i>V. lathyroides</i> L.                                 | VLT  | IPK                   | VIC874  | 12                       | 4.960       | 0.019 | ZM   | 2.43        | 2.43         |
| <i>V. cracca</i> L. var. <i>cracca</i>                   | VCR  | IPK                   | VIC71   | 28                       | 11.848      | 0.055 | PS   | 5.79        | 2.90         |
| <i>V. tetrasperma</i> (L.) Schreb.                       | VTS  | IPK                   | VIC726  | 14                       | 6.245       | 0.015 | GM   | 3.05        | 3.05         |
| <i>V. sepium</i> L.                                      | VSP  | IPK                   | VIC55   | 14                       | 7.656       | 0.047 | ZM   | 3.74        | 3.74         |
| <i>V. grandiflora</i>                                    | VGR  | IPK                   | VIC741  | 14                       | 7.732       | 0.087 | ZM   | 3.78        | 3.78         |
| <i>V. hirsuta</i> (L.) S.F.Gray                          | VHR  | IPK                   | VIC728  | 14                       | 7.925       | 0.049 | ZM   | 3.88        | 3.88         |
| <i>V. ervilia</i> (L.) Willd.                            | VER  | IPK                   | ERV52   | 14                       | 8.297       | 0.067 | ZM   | 4.06        | 4.06         |
| <i>V. unijuga</i> A.Br.                                  | VUN  | IPK                   | VIC78   | 12                       | 8.932       | 0.055 | ZM   | 4.37        | 4.37         |
| <i>V. pannonica</i> 'Dětěnická panonská'                 | VPN  | commercial            |         | 12                       | 11.720      | 0.069 | PS   | 5.73        | 5.73         |
| <i>V. pisiformis</i> L.                                  | VPF  | IPK                   | VIC36   | 12                       | 12.585      | 0.018 | PS   | 6.15        | 6.15         |
| <i>V. narbonensis</i>                                    | VNR  | ICARDA                | 14      | 14                       | 13.675      | 0.064 | PS   | 6.69        | 6.69         |
| <i>V. sylvatica</i> L.                                   | VSL  | IPK                   | VIC63   | 14                       | 14.280      | 0.063 | PS   | 6.98        | 6.98         |
| <i>V. melanops</i> Sibth. et Sm.<br>var. <i>melanops</i> | VML  | IPK                   | VIC474  | 10                       | 16.495      | 0.036 | PS   | 8.07        | 8.07         |
| <i>V. peregrina</i> L.                                   | VPR  | IPK                   | VIC765  | 14                       | 17.273      | 0.043 | PS   | 8.45        | 8.45         |
| <i>V. faba</i> 'Merkur'                                  | VFB  | commercial            |         | 12                       | 27.423      | 0.214 | PS   | 13.41       | 13.41        |
| <b><i>Lens</i></b>                                       |      |                       |         |                          |             |       |      |             |              |
| <i>L. culinaris</i> 'Eston'                              | LNS  | commercial            |         | 14                       | 8.771       | 0.027 | ZM   | 4.29        | 4.29         |
| <b><i>Lathyrus</i></b>                                   |      |                       |         |                          |             |       |      |             |              |
| <i>L. vernus</i> (L.) Bernh.                             | LAV  | natural<br>population |         | 14                       | 12.091      | 0.040 | PS   | 5.91        | 5.91         |
| <i>L. sativus</i> L.                                     | LAS  | commercial            |         | 14                       | 13.343      | 0.094 | PS   | 6.52        | 6.52         |
| <i>L. latifolius</i> L.                                  | LAL  | commercial            |         | 14                       | 20.404      | 0.092 | PS   | 9.98        | 9.98         |
| <b><i>Pisum</i></b>                                      |      |                       |         |                          |             |       |      |             |              |
| <i>P. sativum</i> 'Terno'                                | PST  | commercial            |         | 14                       | 8.921       | 0.020 | ZM   | 4.36        | 4.36         |
| <i>P. fulvum</i>                                         | PFL  | ICARDA                | IG64207 | 14                       | 9.587       | 0.020 | ZM   | 4.69        | 4.69         |

Genome size standards (column "std."): ZM, *Zea mays*; GM, *Glycine max*; PS, *Pisum sativum*
