# Supplementary material for: In Depth Characterization of Repetitive DNA in 23 Plant Genomes Reveals Sources of Genome Size Variation in the Legume Tribe Fabeae
Source: PubMed Central journal article supplement (PMC4659654; doi:10.1371/journal.pone.0143424), 2015-11-25
Supplement: pone.0143424.s006.pdf [file pone.0143424.s006.pdf]

**A – Total length [Mbp] of individual repeat types per monoploid genome**

| species:         | VSA         | VVL         | VLT         | VCR         | VTS         | VSP         | VGR         | VHR         | VER         | VUN         | VPN         | VPF         | VNR         | VSL         | VML         | VPR         | VFB         | LNS         | LAV         | LAS         | LAL         | PST         | PFL         |
|------------------|-------------|-------------|-------------|-------------|-------------|-------------|-------------|-------------|-------------|-------------|-------------|-------------|-------------|-------------|-------------|-------------|-------------|-------------|-------------|-------------|-------------|-------------|-------------|
| 1Cx[Gbp]:        | 1.77        | 2.04        | 2.43        | 2.90        | 3.05        | 3.74        | 3.78        | 3.88        | 4.06        | 4.37        | 5.73        | 6.15        | 6.69        | 6.98        | 8.07        | 8.45        | 13.41       | 4.29        | 5.91        | 6.52        | 9.98        | 4.36        | 4.69        |
| <b>LTR/gypsy</b> |             |             |             |             |             |             |             |             |             |             |             |             |             |             |             |             |             |             |             |             |             |             |             |
| Ogre             | 397.8       | 512.7       | 965.5       | 736.7       | 1025.5      | 1538.7      | 2124.5      | 1761.2      | 1883.7      | 1186.3      | 2538.8      | 2929.2      | 4328.8      | 3930.2      | 4450.8      | 3263.8      | 7284.8      | 1532.6      | 2282.4      | 2963.7      | 3063.5      | 2079.1      | 2697.5      |
| Tat              | 29.3        | 49.5        | 75.9        | 133.0       | 50.8        | 128.1       | 91.8        | 97.1        | 135.4       | 148.1       | 88.9        | 144.9       | 110.2       | 84.5        | 141.5       | 236.3       | 253.4       | 117.0       | 341.5       | 33.1        | 161.0       | 24.1        | 30.6        |
| Chrom            | 80.4        | 70.7        | 150.2       | 396.0       | 115.0       | 470.0       | 232.0       | 365.0       | 545.2       | 562.3       | 491.4       | 512.2       | 339.7       | 988.9       | 610.9       | 488.1       | 251.2       | 602.2       | 466.8       | 216.9       | 1012.0      | 182.5       | 259.5       |
| Athila           | 20.4        | 50.0        | 74.8        | 105.1       | 133.3       | 78.1        | 89.2        | 110.0       | 100.6       | 173.0       | 85.6        | 185.4       | 108.6       | 75.4        | 162.6       | 218.0       | 145.6       | 69.3        | 332.1       | 202.7       | 188.4       | 158.2       | 173.2       |
| <b>LTR/copia</b> |             |             |             |             |             |             |             |             |             |             |             |             |             |             |             |             |             |             |             |             |             |             |             |
| Max.             | 73.6        | 209.0       | 90.4        | 345.5       | 332.4       | 310.6       | 250.5       | 371.5       | 290.9       | 483.3       | 191.1       | 498.9       | 250.7       | 264.5       | 297.5       | 755.9       | 907.6       | 484.2       | 638.7       | 446.8       | 469.5       | 415.6       | 274.2       |
| Ivana            | 19.0        | 5.8         | 28.1        | 26.2        | 35.9        | 40.6        | 19.1        | 17.9        | 13.2        | 52.5        | 47.4        | 55.8        | 21.9        | 32.7        | 47.5        | 34.1        | 109.0       | 14.5        | 69.6        | 19.0        | 72.1        | 61.5        | 39.6        |
| Angela           | 3.2         | 0.7         | 6.8         | 2.2         | 12.5        | 18.9        | 11.5        | 3.7         | 16.0        | 16.1        | 6.2         | 10.6        | 18.9        | 8.9         | 8.0         | 24.9        | 31.5        | 6.7         | 34.3        | 13.0        | 29.8        | 135.1       | 103.6       |
| Tork             | 8.3         | 8.2         | 17.8        | 24.7        | 16.6        | 8.0         | 0.6         | 9.0         | 29.6        | 22.0        | 29.5        | 35.6        | 9.4         | 36.8        | 21.4        | 19.9        | 10.1        | 10.6        | 30.7        | 21.3        | 52.3        | 12.0        | 5.7         |
| Bianka           | 1.6         | 3.5         | 5.1         | 4.5         | 2.0         | 0.8         | 1.2         | 2.2         | 3.1         | 12.2        | 3.7         | 5.0         | 1.4         | 1.6         | 0.0         | 11.7        | 0.0         | 0.0         | 2.7         | 0.0         | 10.2        | 0.0         | 0.0         |
| TAR              | 0.0         | 6.6         | 10.6        | 7.9         | 3.5         | 0.5         | 0.6         | 3.8         | 2.4         | 5.1         | 7.9         | 9.4         | 7.3         | 0.0         | 12.1        | 4.6         | 7.5         | 1.5         | 3.7         | 4.5         | 5.4         | 11.5        | 4.3         |
| Alell            | 0.8         | 1.0         | 3.2         | 2.8         | 5.3         | 0.0         | 1.6         | 1.9         | 4.1         | 4.6         | 0.0         | 2.0         | 3.9         | 1.7         | 1.0         | 2.4         | 0.0         | 0.5         | 3.4         | 1.0         | 0.0         | 7.2         | 1.8         |
| Alel             | 0.0         | 0.0         | 0.0         | 0.0         | 0.0         | 0.0         | 0.0         | 0.0         | 0.0         | 0.0         | 0.0         | 0.0         | 0.0         | 2.6         | 0.0         | 0.0         | 0.0         | 0.0         | 0.0         | 0.0         | 0.0         | 0.4         | 1.1         |
| TRIM             | 0.2         | 0.0         | 0.9         | 1.0         | 1.4         | 1.0         | 0.0         | 0.5         | 0.7         | 0.7         | 0.0         | 1.0         | 0.0         | 2.0         | 2.3         | 0.0         | 0.0         | 0.8         | 0.8         | 1.8         | 0.0         | 16.6        | 11.5        |
| LTR unclas       | 123.5       | 16.1        | 168.1       | 59.5        | 87.3        | 70.4        | 93.0        | 39.3        | 20.1        | 96.8        | 294.1       | 137.2       | 80.7        | 223.6       | 116.9       | 519.8       | 189.5       | 108.7       | 159.8       | 329.8       | 1436.1      | 34.9        | 6.6         |
| LINE             | 0.0         | 0.0         | 0.0         | 1.7         | 2.2         | 0.5         | 0.0         | 0.9         | 0.0         | 2.1         | 0.0         | 1.6         | 0.0         | 0.0         | 1.0         | 0.0         | 0.0         | 7.3         | 5.0         | 0.0         | 0.0         | 0.0         | 0.0         |
| SINE             | 0.0         | 0.3         | 0.0         | 0.0         | 0.0         | 0.0         | 0.0         | 0.0         | 0.0         | 0.0         | 0.0         | 0.0         | 0.0         | 0.0         | 0.0         | 0.0         | 0.0         | 0.0         | 0.0         | 0.0         | 0.0         | 0.0         | 0.0         |
| PARA             | 0.0         | 0.0         | 1.3         | 2.0         | 3.4         | 0.0         | 0.0         | 1.5         | 0.5         | 4.2         | 0.0         | 5.3         | 0.0         | 19.2        | 0.0         | 1.9         | 0.0         | 0.5         | 4.9         | 0.0         | 5.5         | 0.0         | 1.2         |
| <b>DNA</b>       |             |             |             |             |             |             |             |             |             |             |             |             |             |             |             |             |             |             |             |             |             |             |             |
| CACTA            | 16.1        | 5.9         | 9.4         | 26.2        | 56.9        | 8.6         | 4.9         | 23.0        | 65.9        | 83.7        | 20.6        | 90.8        | 20.1        | 47.5        | 50.4        | 56.1        | 81.7        | 72.0        | 51.3        | 1.6         | 47.4        | 34.6        | 25.2        |
| Mutator          | 6.7         | 12.3        | 11.1        | 31.3        | 51.7        | 22.9        | 11.6        | 19.2        | 18.9        | 34.0        | 5.0         | 10.6        | 8.4         | 20.0        | 12.1        | 47.1        | 35.1        | 25.0        | 29.6        | 2.0         | 24.0        | 44.0        | 49.8        |
| hAT              | 0.0         | 1.8         | 0.3         | 4.6         | 2.8         | 0.0         | 0.0         | 0.0         | 1.3         | 7.9         | 0.0         | 0.0         | 0.0         | 0.0         | 0.0         | 1.0         | 0.0         | 0.5         | 2.5         | 0.7         | 2.9         | 3.3         | 1.4         |
| PIF/Har.         | 0.0         | 0.7         | 0.0         | 1.5         | 0.8         | 0.0         | 0.0         | 0.0         | 0.0         | 2.5         | 0.0         | 0.0         | 0.0         | 0.0         | 0.0         | 1.2         | 0.0         | 0.0         | 0.0         | 0.0         | 0.0         | 0.0         | 0.0         |
| Tc1/Mar.         | 0.0         | 0.0         | 0.0         | 0.0         | 0.0         | 0.0         | 0.0         | 0.0         | 0.0         | 0.0         | 0.0         | 0.0         | 0.0         | 0.0         | 1.2         | 0.0         | 0.0         | 0.0         | 0.0         | 0.0         | 0.0         | 0.0         | 0.0         |
| MITE             | 1.1         | 3.6         | 1.8         | 1.3         | 0.0         | 0.4         | 2.7         | 0.0         | 0.0         | 2.7         | 0.6         | 0.7         | 0.0         | 0.0         | 0.8         | 0.0         | 0.0         | 0.0         | 0.8         | 0.0         | 0.0         | 0.0         | 0.0         |
| unclass.         | 0.0         | 17.1        | 0.3         | 2.4         | 0.0         | 0.0         | 8.5         | 0.8         | 4.8         | 0.0         | 0.0         | 0.0         | 0.0         | 0.0         | 6.8         | 0.0         | 4.8         | 3.5         | 0.0         | 17.0        | 26.1        | 0.0         | 5.0         |
| Helitron         | 0.3         | 0.0         | 1.0         | 7.8         | 6.6         | 0.0         | 0.0         | 0.0         | 0.0         | 8.4         | 0.0         | 0.0         | 0.0         | 0.0         | 0.0         | 7.8         | 1.9         | 2.7         | 3.5         | 0.0         | 0.0         | 1.6         | 0.0         |
| Satellite        | 184.4       | 250.0       | 77.0        | 49.6        | 45.5        | 26.7        | 101.8       | 109.2       | 22.5        | 45.5        | 369.5       | 90.7        | 140.2       | 6.4         | 293.7       | 183.0       | 935.1       | 49.0        | 46.7        | 699.4       | 364.9       | 92.0        | 72.6        |
| Tandem           | 0.0         | 0.0         | 5.1         | 1.5         | 15.8        | 9.1         | 9.9         | 44.5        | 0.0         | 15.4        | 0.0         | 20.1        | 7.2         | 1.2         | 6.0         | 174.8       | 367.8       | 24.2        | 24.2        | 56.2        | 11.4        | 1.7         | 1.3         |
| rDNA             | 5.5         | 10.5        | 42.5        | 25.8        | 29.5        | 54.8        | 58.4        | 55.1        | 34.2        | 22.5        | 48.2        | 33.3        | 25.3        | 54.5        | 64.5        | 64.6        | 45.1        | 49.7        | 73.0        | 110.2       | 31.2        | 11.7        | 40.8        |
| unclass.         | 80.7        | 46.2        | 45.1        | 87.3        | 170.6       | 91.3        | 38.0        | 100.4       | 44.3        | 233.3       | 100.1       | 263.3       | 146.9       | 178.9       | 60.6        | 525.3       | 441.3       | 317.6       | 164.7       | 155.4       | 519.6       | 149.6       | 65.6        |
| % genome         | <b>59.5</b> | <b>62.9</b> | <b>73.8</b> | <b>72.0</b> | <b>72.4</b> | <b>77.0</b> | <b>83.4</b> | <b>80.9</b> | <b>79.7</b> | <b>73.8</b> | <b>75.5</b> | <b>82.0</b> | <b>84.2</b> | <b>85.7</b> | <b>78.9</b> | <b>78.6</b> | <b>82.8</b> | <b>81.6</b> | <b>80.8</b> | <b>81.2</b> | <b>75.5</b> | <b>79.8</b> | <b>82.6</b> |
| % annot.         | <b>92.3</b> | <b>96.4</b> | <b>97.5</b> | <b>95.8</b> | <b>92.3</b> | <b>96.8</b> | <b>98.8</b> | <b>96.8</b> | <b>98.6</b> | <b>92.8</b> | <b>97.7</b> | <b>94.8</b> | <b>97.4</b> | <b>97.0</b> | <b>99.0</b> | <b>92.1</b> | <b>96.0</b> | <b>90.9</b> | <b>96.5</b> | <b>97.1</b> | <b>93.1</b> | <b>95.7</b> | <b>98.3</b> |
| % gen.ann.       | <b>54.9</b> | <b>60.6</b> | <b>71.9</b> | <b>69.0</b> | <b>66.8</b> | <b>74.6</b> | <b>82.4</b> | <b>78.3</b> | <b>78.6</b> | <b>68.5</b> | <b>73.8</b> | <b>77.7</b> | <b>82.0</b> | <b>83.1</b> | <b>78.2</b> | <b>72.4</b> | <b>79.5</b> | <b>74.2</b> | <b>78.0</b> | <b>78.8</b> | <b>70.3</b> | <b>76.3</b> | <b>81.2</b> |

## B – Genome proportions [%] of repeats

| species:          | VSA   | VVL   | VLT   | VCR   | VTS   | VSP   | VGR   | VHR   | VER   | VUN   | VPN   | VPF   | VNR   | VSL   | VML   | VPR   | VFB   | LNS   | LAV   | LAS   | LAL   | PST   | PFL   |  |
|-------------------|-------|-------|-------|-------|-------|-------|-------|-------|-------|-------|-------|-------|-------|-------|-------|-------|-------|-------|-------|-------|-------|-------|-------|--|
| 1Cx[Gbp]:         | 1.77  | 2.04  | 2.43  | 2.9   | 3.05  | 3.74  | 3.78  | 3.88  | 4.06  | 4.37  | 5.73  | 6.15  | 6.69  | 6.98  | 8.07  | 8.45  | 13.41 | 4.29  | 5.91  | 6.52  | 9.98  | 4.36  | 4.69  |  |
| <b>LTR/gypsy</b>  |       |       |       |       |       |       |       |       |       |       |       |       |       |       |       |       |       |       |       |       |       |       |       |  |
| <b>Ogre</b>       | 22.48 | 25.13 | 39.73 | 25.40 | 33.62 | 41.14 | 56.20 | 45.39 | 46.40 | 27.15 | 44.31 | 47.63 | 64.71 | 56.31 | 55.15 | 38.63 | 54.32 | 35.72 | 38.62 | 45.46 | 30.70 | 47.69 | 57.52 |  |
| <b>Tat</b>        | 1.66  | 2.43  | 3.12  | 4.59  | 1.66  | 3.42  | 2.43  | 2.50  | 3.34  | 3.39  | 1.55  | 2.36  | 1.65  | 1.21  | 1.75  | 2.80  | 1.89  | 2.73  | 5.78  | 0.51  | 1.61  | 0.55  | 0.65  |  |
| <b>Chrom</b>      | 4.54  | 3.47  | 6.18  | 13.65 | 3.77  | 12.57 | 6.14  | 9.41  | 13.43 | 12.87 | 8.58  | 8.33  | 5.08  | 14.17 | 7.57  | 5.78  | 1.87  | 14.04 | 7.90  | 3.33  | 10.14 | 4.19  | 5.53  |  |
| <b>Athila</b>     | 1.15  | 2.45  | 3.08  | 3.62  | 4.37  | 2.09  | 2.36  | 2.84  | 2.48  | 3.96  | 1.49  | 3.02  | 1.62  | 1.08  | 2.02  | 2.58  | 1.09  | 1.62  | 5.62  | 3.11  | 1.89  | 3.63  | 3.69  |  |
| <b>LTR/copia</b>  |       |       |       |       |       |       |       |       |       |       |       |       |       |       |       |       |       |       |       |       |       |       |       |  |
| <b>Max.</b>       | 4.16  | 10.24 | 3.72  | 11.91 | 10.90 | 8.31  | 6.63  | 9.57  | 7.16  | 11.06 | 3.34  | 8.11  | 3.75  | 3.79  | 3.69  | 8.95  | 6.77  | 11.29 | 10.81 | 6.85  | 4.70  | 9.53  | 5.85  |  |
| <b>Ivana</b>      | 1.07  | 0.29  | 1.16  | 0.90  | 1.18  | 1.09  | 0.51  | 0.46  | 0.33  | 1.20  | 0.83  | 0.91  | 0.33  | 0.47  | 0.59  | 0.40  | 0.81  | 0.34  | 1.18  | 0.29  | 0.72  | 1.41  | 0.85  |  |
| <b>Angela</b>     | 0.18  | 0.03  | 0.28  | 0.08  | 0.41  | 0.51  | 0.30  | 0.10  | 0.39  | 0.37  | 0.11  | 0.17  | 0.28  | 0.13  | 0.10  | 0.29  | 0.23  | 0.16  | 0.58  | 0.20  | 0.30  | 3.10  | 2.21  |  |
| <b>Tork</b>       | 0.47  | 0.40  | 0.73  | 0.85  | 0.54  | 0.21  | 0.02  | 0.23  | 0.73  | 0.50  | 0.51  | 0.58  | 0.14  | 0.53  | 0.27  | 0.24  | 0.08  | 0.25  | 0.52  | 0.33  | 0.52  | 0.28  | 0.12  |  |
| <b>Bianka</b>     | 0.09  | 0.17  | 0.21  | 0.16  | 0.07  | 0.02  | 0.03  | 0.06  | 0.08  | 0.28  | 0.06  | 0.08  | 0.02  | 0.02  | 0.00  | 0.14  | 0.00  | 0.00  | 0.05  | 0.00  | 0.10  | 0.00  | 0.00  |  |
| <b>TAR</b>        | 0.00  | 0.32  | 0.44  | 0.27  | 0.11  | 0.01  | 0.02  | 0.10  | 0.06  | 0.12  | 0.14  | 0.15  | 0.11  | 0.00  | 0.15  | 0.05  | 0.06  | 0.03  | 0.06  | 0.07  | 0.05  | 0.26  | 0.09  |  |
| <b>Alell</b>      | 0.05  | 0.05  | 0.13  | 0.10  | 0.17  | 0.00  | 0.04  | 0.05  | 0.10  | 0.11  | 0.00  | 0.03  | 0.06  | 0.02  | 0.01  | 0.03  | 0.00  | 0.01  | 0.06  | 0.02  | 0.00  | 0.17  | 0.04  |  |
| <b>Alel</b>       | 0.00  | 0.00  | 0.00  | 0.00  | 0.00  | 0.00  | 0.00  | 0.00  | 0.00  | 0.00  | 0.00  | 0.00  | 0.00  | 0.04  | 0.00  | 0.00  | 0.00  | 0.00  | 0.00  | 0.00  | 0.00  | 0.01  | 0.02  |  |
| <b>TRIM</b>       | 0.01  | 0.00  | 0.04  | 0.03  | 0.05  | 0.03  | 0.00  | 0.01  | 0.02  | 0.02  | 0.00  | 0.02  | 0.00  | 0.03  | 0.03  | 0.00  | 0.00  | 0.02  | 0.01  | 0.03  | 0.00  | 0.38  | 0.25  |  |
| <b>LTR unclas</b> | 6.98  | 0.79  | 6.92  | 2.05  | 2.86  | 1.88  | 2.46  | 1.01  | 0.49  | 2.22  | 5.13  | 2.23  | 1.21  | 3.20  | 1.45  | 6.15  | 1.41  | 2.53  | 2.70  | 5.06  | 14.39 | 0.80  | 0.14  |  |
| <b>LINE</b>       | 0.00  | 0.00  | 0.00  | 0.06  | 0.07  | 0.01  | 0.00  | 0.02  | 0.00  | 0.05  | 0.00  | 0.03  | 0.00  | 0.00  | 0.01  | 0.00  | 0.00  | 0.17  | 0.08  | 0.00  | 0.00  | 0.00  | 0.00  |  |
| <b>SINE</b>       | 0.00  | 0.01  | 0.00  | 0.00  | 0.00  | 0.00  | 0.00  | 0.00  | 0.00  | 0.00  | 0.00  | 0.00  | 0.00  | 0.00  | 0.00  | 0.00  | 0.00  | 0.00  | 0.00  | 0.00  | 0.00  | 0.00  | 0.00  |  |
| <b>PARA</b>       | 0.00  | 0.00  | 0.05  | 0.07  | 0.11  | 0.00  | 0.00  | 0.04  | 0.01  | 0.10  | 0.00  | 0.09  | 0.00  | 0.28  | 0.00  | 0.02  | 0.00  | 0.01  | 0.08  | 0.00  | 0.06  | 0.00  | 0.03  |  |
| <b>DNA</b>        |       |       |       |       |       |       |       |       |       |       |       |       |       |       |       |       |       |       |       |       |       |       |       |  |
| <b>CACTA</b>      | 0.91  | 0.29  | 0.39  | 0.90  | 1.87  | 0.23  | 0.13  | 0.59  | 1.62  | 1.92  | 0.36  | 1.48  | 0.30  | 0.68  | 0.63  | 0.66  | 0.61  | 1.68  | 0.87  | 0.03  | 0.48  | 0.79  | 0.54  |  |
| <b>Mutator</b>    | 0.38  | 0.61  | 0.46  | 1.08  | 1.70  | 0.61  | 0.31  | 0.50  | 0.47  | 0.78  | 0.09  | 0.17  | 0.13  | 0.29  | 0.15  | 0.56  | 0.26  | 0.58  | 0.50  | 0.03  | 0.24  | 1.01  | 1.06  |  |
| <b>hAT</b>        | 0.00  | 0.09  | 0.01  | 0.16  | 0.09  | 0.00  | 0.00  | 0.00  | 0.03  | 0.18  | 0.00  | 0.00  | 0.00  | 0.00  | 0.00  | 0.01  | 0.00  | 0.01  | 0.04  | 0.01  | 0.03  | 0.08  | 0.03  |  |
| <b>PIF/Har.</b>   | 0.00  | 0.04  | 0.00  | 0.05  | 0.03  | 0.00  | 0.00  | 0.00  | 0.00  | 0.06  | 0.00  | 0.00  | 0.00  | 0.00  | 0.00  | 0.01  | 0.00  | 0.00  | 0.00  | 0.00  | 0.00  | 0.00  | 0.00  |  |
| <b>Tc1/Mar.</b>   | 0.00  | 0.00  | 0.00  | 0.00  | 0.00  | 0.00  | 0.00  | 0.00  | 0.00  | 0.00  | 0.00  | 0.00  | 0.00  | 0.00  | 0.02  | 0.00  | 0.00  | 0.00  | 0.00  | 0.00  | 0.00  | 0.00  | 0.00  |  |
| <b>MITE</b>       | 0.06  | 0.18  | 0.07  | 0.04  | 0.00  | 0.01  | 0.07  | 0.00  | 0.00  | 0.06  | 0.01  | 0.01  | 0.00  | 0.00  | 0.01  | 0.00  | 0.00  | 0.00  | 0.01  | 0.00  | 0.00  | 0.00  | 0.00  |  |
| <b>unclass.</b>   | 0.00  | 0.84  | 0.01  | 0.08  | 0.00  | 0.00  | 0.23  | 0.02  | 0.12  | 0.00  | 0.00  | 0.00  | 0.00  | 0.00  | 0.08  | 0.00  | 0.04  | 0.08  | 0.00  | 0.26  | 0.26  | 0.00  | 0.11  |  |
| <b>Helitron</b>   | 0.02  | 0.00  | 0.04  | 0.27  | 0.22  | 0.00  | 0.00  | 0.00  | 0.00  | 0.19  | 0.00  | 0.00  | 0.00  | 0.00  | 0.00  | 0.09  | 0.01  | 0.06  | 0.06  | 0.00  | 0.00  | 0.04  | 0.00  |  |
| <b>Satellite</b>  | 10.42 | 12.26 | 3.17  | 1.71  | 1.49  | 0.72  | 2.69  | 2.82  | 0.55  | 1.04  | 6.45  | 1.48  | 2.10  | 0.09  | 3.64  | 2.17  | 6.97  | 1.14  | 0.79  | 10.73 | 3.66  | 2.11  | 1.55  |  |
| <b>Tandem</b>     | 0.00  | 0.00  | 0.21  | 0.05  | 0.52  | 0.24  | 0.26  | 1.15  | 0.00  | 0.35  | 0.00  | 0.33  | 0.11  | 0.02  | 0.07  | 2.07  | 2.74  | 0.56  | 0.41  | 0.86  | 0.11  | 0.04  | 0.03  |  |
| <b>rDNA</b>       | 0.31  | 0.51  | 1.75  | 0.89  | 0.97  | 1.46  | 1.54  | 1.42  | 0.84  | 0.52  | 0.84  | 0.54  | 0.38  | 0.78  | 0.80  | 0.77  | 0.34  | 1.16  | 1.24  | 1.69  | 0.31  | 0.27  | 0.87  |  |
| <b>unclass.</b>   | 4.56  | 2.26  | 1.86  | 3.01  | 5.59  | 2.44  | 1.01  | 2.59  | 1.09  | 5.34  | 1.75  | 4.28  | 2.20  | 2.56  | 0.75  | 6.22  | 3.29  | 7.40  | 2.79  | 2.38  | 5.21  | 3.43  | 1.40  |  |
| <b>total</b>      | 59.5  | 62.9  | 73.8  | 72.0  | 72.4  | 77.0  | 83.4  | 80.9  | 79.7  | 73.8  | 75.5  | 82.0  | 84.2  | 85.7  | 78.9  | 78.6  | 82.8  | 81.6  | 80.8  | 81.2  | 75.5  | 79.8  | 82.6  |  |
| <b>annotated</b>  | 54.9  | 60.6  | 71.9  | 69.0  | 66.8  | 74.6  | 82.4  | 78.3  | 78.6  | 68.5  | 73.8  | 77.7  | 82.0  | 83.1  | 78.2  | 72.4  | 79.5  | 74.2  | 78.0  | 78.8  | 70.3  | 76.3  | 81.2  |  |
